# Supplementary material
Source: HighWire-hosted journal article supplement (https://jcp.bmj.com/content/71/2/174)
Supplement: inline-supplementary-material-2 [file inline-supplementary-material-2.docx]

| Supplementary Table 1: Combined Lymphocyte and Large Cell Gates | | | | | | |  |  |  |
| --- | --- | --- | --- | --- | --- | --- | --- | --- | --- |
| Normative Distribution of B-,T-NK-Cell Related Epitopes | | | | | | | | |  |
|  |  |  | Med | (Q1, Q3) | (5%, 95%) | N |  | %CD19 | (Q1, Q3) |
|  |  |  |  |  |  |  |  |  |  |
|  | % CD45 | | **97** | (92, 98) | (68, 100) | **298** |  |  |  |
|  |  | CD3:CD19 | **1.7** | (1.0, 2.9) | (0.5, 6.8) | **284** |  |  |  |
|  | B Cell Antigens | |  |  |  |  |  |  |  |
|  |  | CD19 | **32** | (21, 44) | (7, 59) | **296** |  |  |  |
|  |  | CD20 | **31** | (20, 42) | (6, 59) | **290** |  | 98% | (94, 102) |
|  |  | CD22 | **34** | (24, 47) | (11, 60) | **269** |  | 107% | (100, 119) |
|  |  | FMC7 | **18** | (9, 28) | (2.1, 44) | **273** |  | 59% | (40, 77) |
|  |  | CD23 | **23** | (13, 31) | (4.1, 46) | **273** |  | 75% | (55, 93) |
|  |  | CD10 | **3.2** | (1.1, 8) | (0.1, 23) | **290** |  | 12% | (5.6, 27) |
|  |  | CD38+CD19+ | **26** | (15, 37) | (6.3, 52) | **284** |  | 84% | (73, 94) |
|  |  | CD5+CD19+ | **2.4** | (1.2, 5) | (0.1, 10) | **290** |  | 8.9% | (5.2, 15) |
|  |  | Kappa+ | **17** | (12, 24) | (6, 34) | **289** |  | 56% | (51, 61) |
|  |  | Lambda+ | **11** | (8, 16) | (3.3, 22) | **288** |  | 37% | (34, 41) |
|  |  | Kappa:Lambda | **1.5** | (1.3, 1.7) | (1, 2.2) | **369** |  |  |  |
|  | T Cell Antigens | |  |  |  |  |  | %CD3 |  |
|  |  | CD3 | **55** | (41, 65) | (27, 79) | **285** |  |  |  |
|  |  | CD4 | **43** | (34, 53) | (20, 67) | **282** |  | 83% | (74, 90) |
|  |  | CD8 | **11** | (7.9, 18) | (3.6, 29) | **282** |  | 22% | (16, 30) |
|  |  | CD5 | **58** | (45, 69) | (26, 80) | **290** |  | 104% | (100, 110) |
|  |  | CD2 | **54** | (40, 65) | (26, 77) | **233** |  | 98% | (95, 101) |
|  |  | CD7 | **52** | (38, 64) | (28, 76) | **234** |  | 96% | (92, 99) |
|  |  | CD16+CD3+ | **0** | (0, 0.1) | (0, 1) | **226** |  | 0% | (0, 0.1) |
|  |  | CD56+CD3+ | **0.1** | (0, 0.5) | (0, 1.8) | **227** |  | 0.2% | (0, 1.1) |
|  |  | CD57+CD3+ | **2.9** | (1.7, 4.9) | (0.9, 10) | **225** |  | 5.3% | (2.7, 10) |
|  |  | CD4:CD8 | **3.6** | (2.4, 5.5) | (1.2, 10) | **282** |  |  |  |
|  | CD7-neg T/NK (%CD2) | | **2.8%** | (-0.9, 7) | (-11, 14) | **233** |  |  |  |
|  |  | CD16+CD3- | **0** | (0, 0.9) | (0, 2) | **228** |  |  |  |
|  |  | CD56+CD3- | **1** | (0.1, 1.1) | (0, 4.1) | **226** |  |  |  |
|  |  | CD57+CD3- | **0** | (0, 0) | (0, 0.9) | **225** |  |  |  |
